# Supplementary material
Source: PubMed Central journal article supplement (PMC7158596)
Supplement: EBM903464_Supplemental_Material1.pdf [file EBM903464_Supplemental_Material1.pdf]

### Supplementary Figure Legends

Supplementary Figure 1. The OPLS-DA model and volcano map of MDR-TB/HC group in HILIC column. The OPLS-DA score scatter plots of ion mode: (a) positive, (c) negative. The permutation test results of ion mode: (b) positive, (d) negative. The differential metabolite volcano maps of ion mode: (e) positive, (f) negative. The upward trend in metabolites was indicated by red scatters, the downward trend in metabolites was indicated by blue scatters, and the non-significant trend in metabolites was indicated by black scatters.

Supplementary Figure 2. The OPLS-DA model and volcano map of MDR-TB/HC group in T3 column. The OPLS-DA score scatter plots of ion mode: (a) positive, (c) negative. The permutation test results of ion mode: (b) positive, (d) negative. The differential metabolite volcano maps of ion mode: (e) positive, (f) negative. The upward trend in metabolites was indicated by red scatters, the downward trend in metabolites was indicated by blue scatters, and the non-significant trend in metabolites was indicated by black scatters.

Supplementary Figure 3. The metabolic pathway map of MDR-TB/HC group. Metabolic pathway map of HILIC column (a), metabolic pathway map of T3 column (b).

Supplementary Figure 4. The OPLS-DA model and volcano map of DS-TB/HC group in HILIC column. The OPLS-DA score scatter plots of ion mode: (a) positive, (c) negative. The permutation test results of ion mode: (b) positive, (d) negative. The differential metabolite volcano maps of ion mode: (e) positive, (f) negative. The upward trend in metabolites was indicated by red scatters, the downward trend in metabolites was indicated by blue scatters, and the non-significant trend in metabolites was indicated by black scatters.

Supplementary Figure 5. The OPLS-DA model and volcano map of DS-TB/HC group in T3 column. The OPLS-DA score scatter plots of ion mode: (a) positive, (c) negative. The permutation test results of ion mode: (b) positive, (d) negative. The differential metabolite volcano maps of ion mode: (e) positive, (f) negative. The upward trend in metabolites was indicated by red scatters, the downward trend in metabolites was indicated by blue scatters, and the non-significant trend in metabolites was indicated by black scatters.

Supplementary Figure 6. The metabolic pathway map of DS-TB/HC group. Metabolic pathway map of HILIC column (a), metabolic pathway map of T3 column (b).

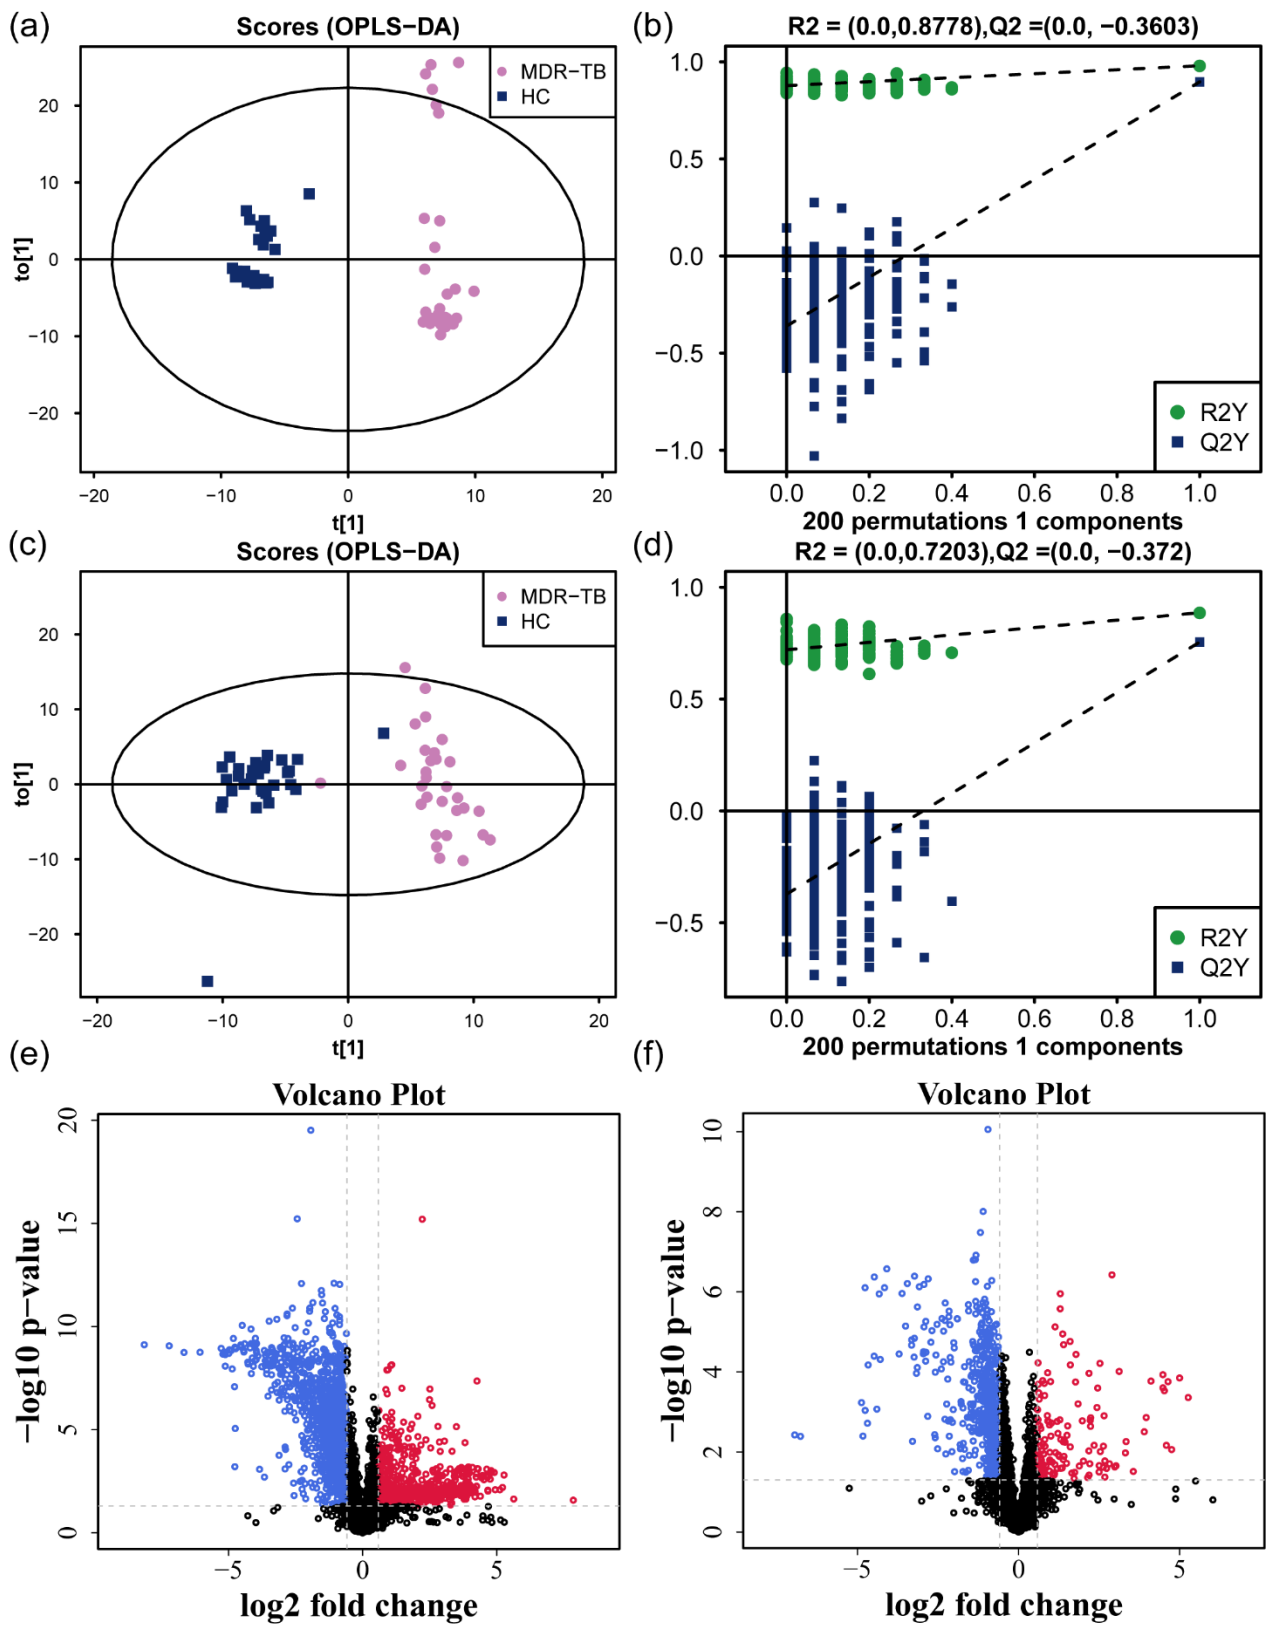

Supplementary Figure 1. The OPLS-DA model and volcano map of MDR-TB/HC group in HILIC column.

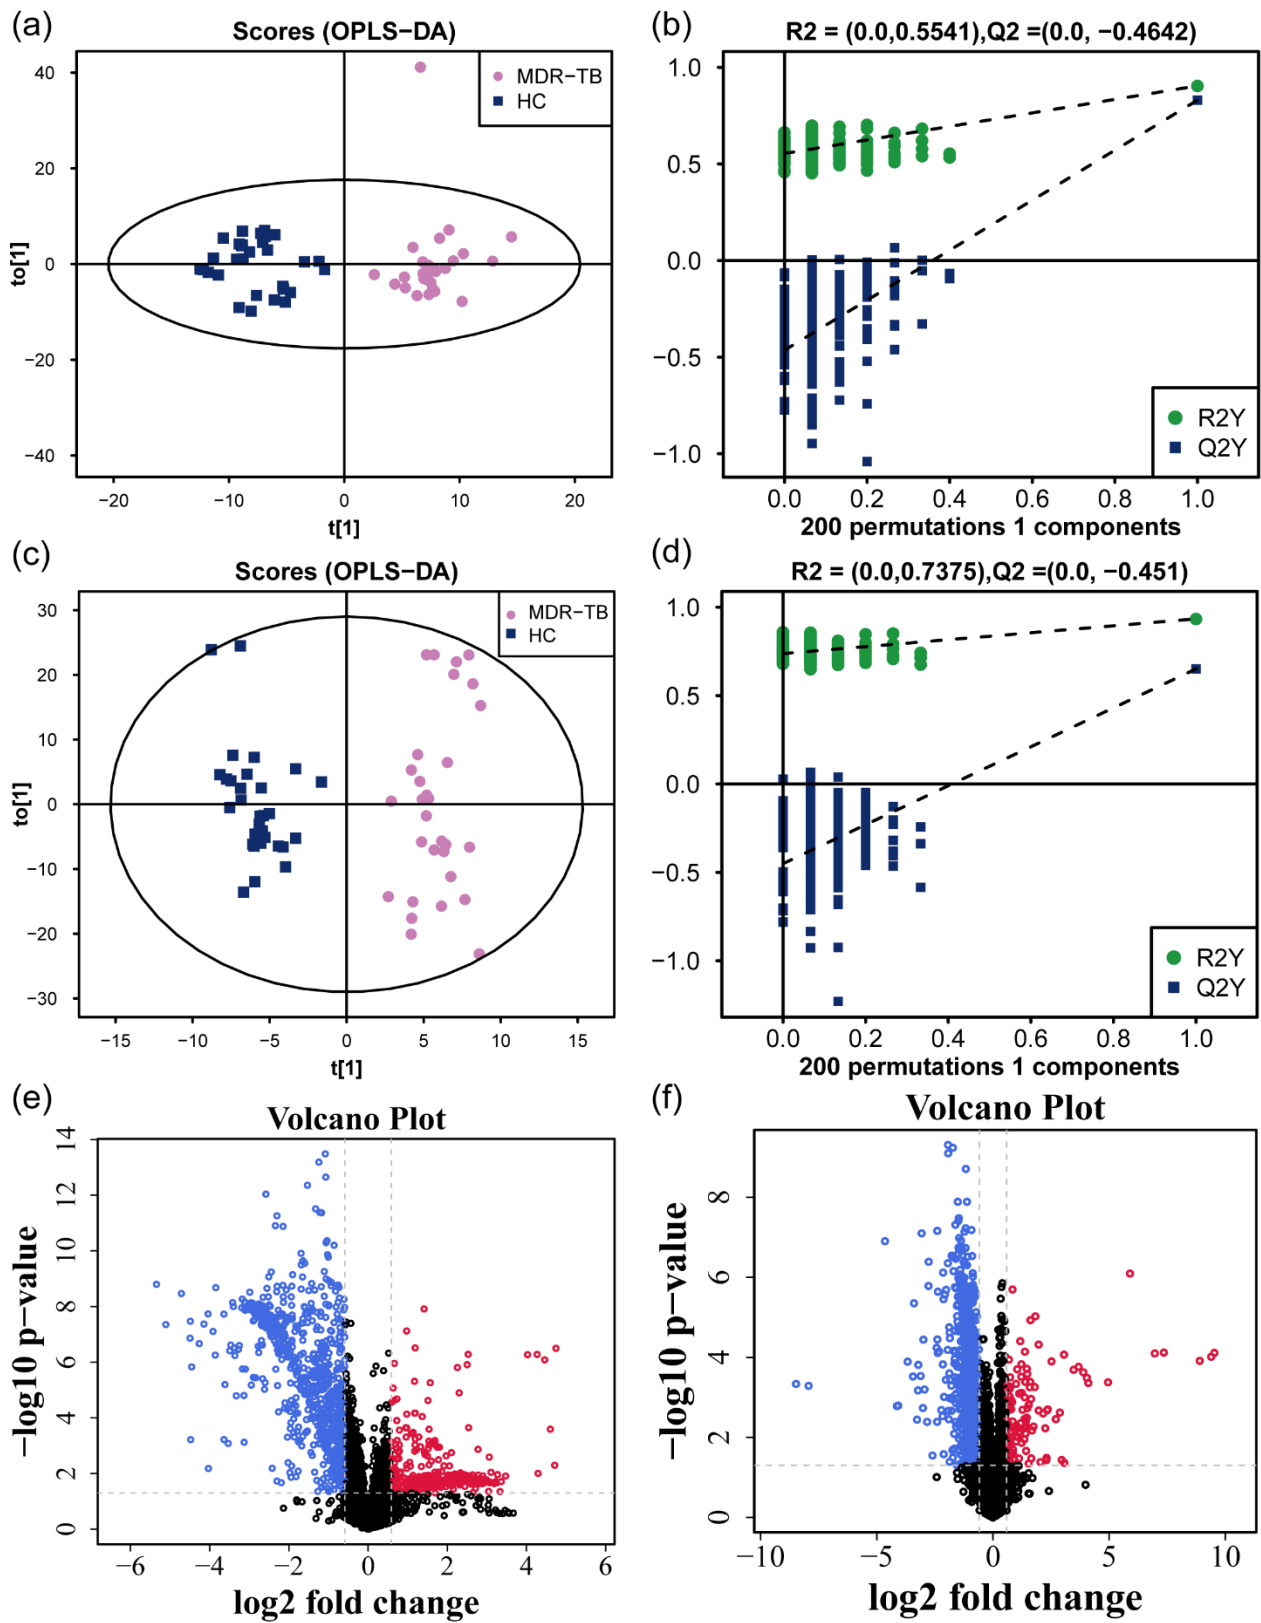

Supplementary Figure 2. The OPLS-DA model and volcano map of MDR-TB/HC group in T3 column.

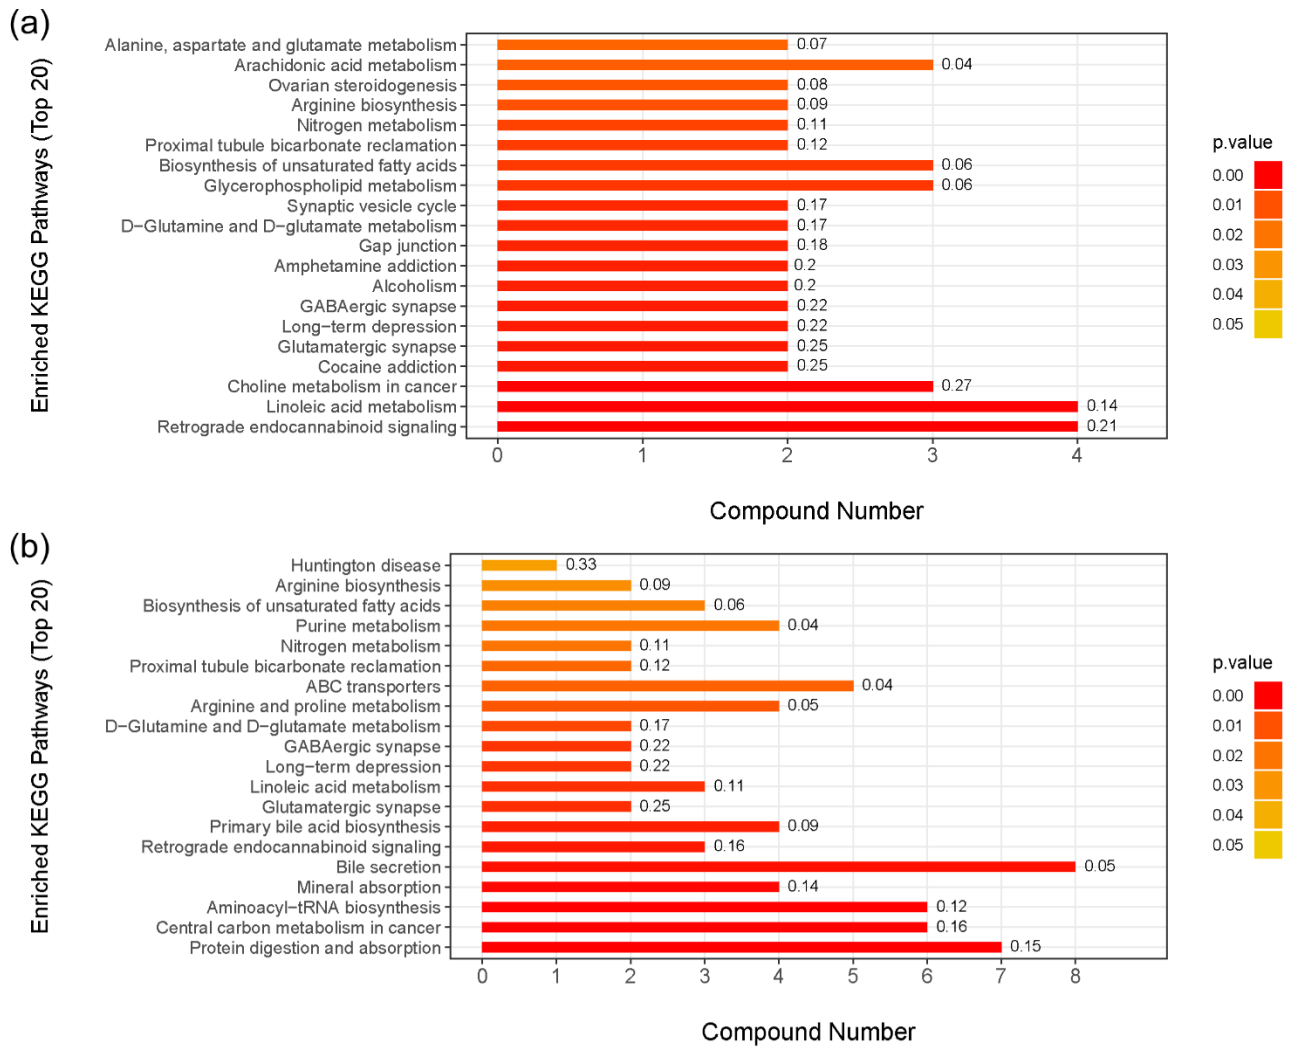

Supplementary Figure 3. The metabolic pathway map of MDR-TB/HC group.

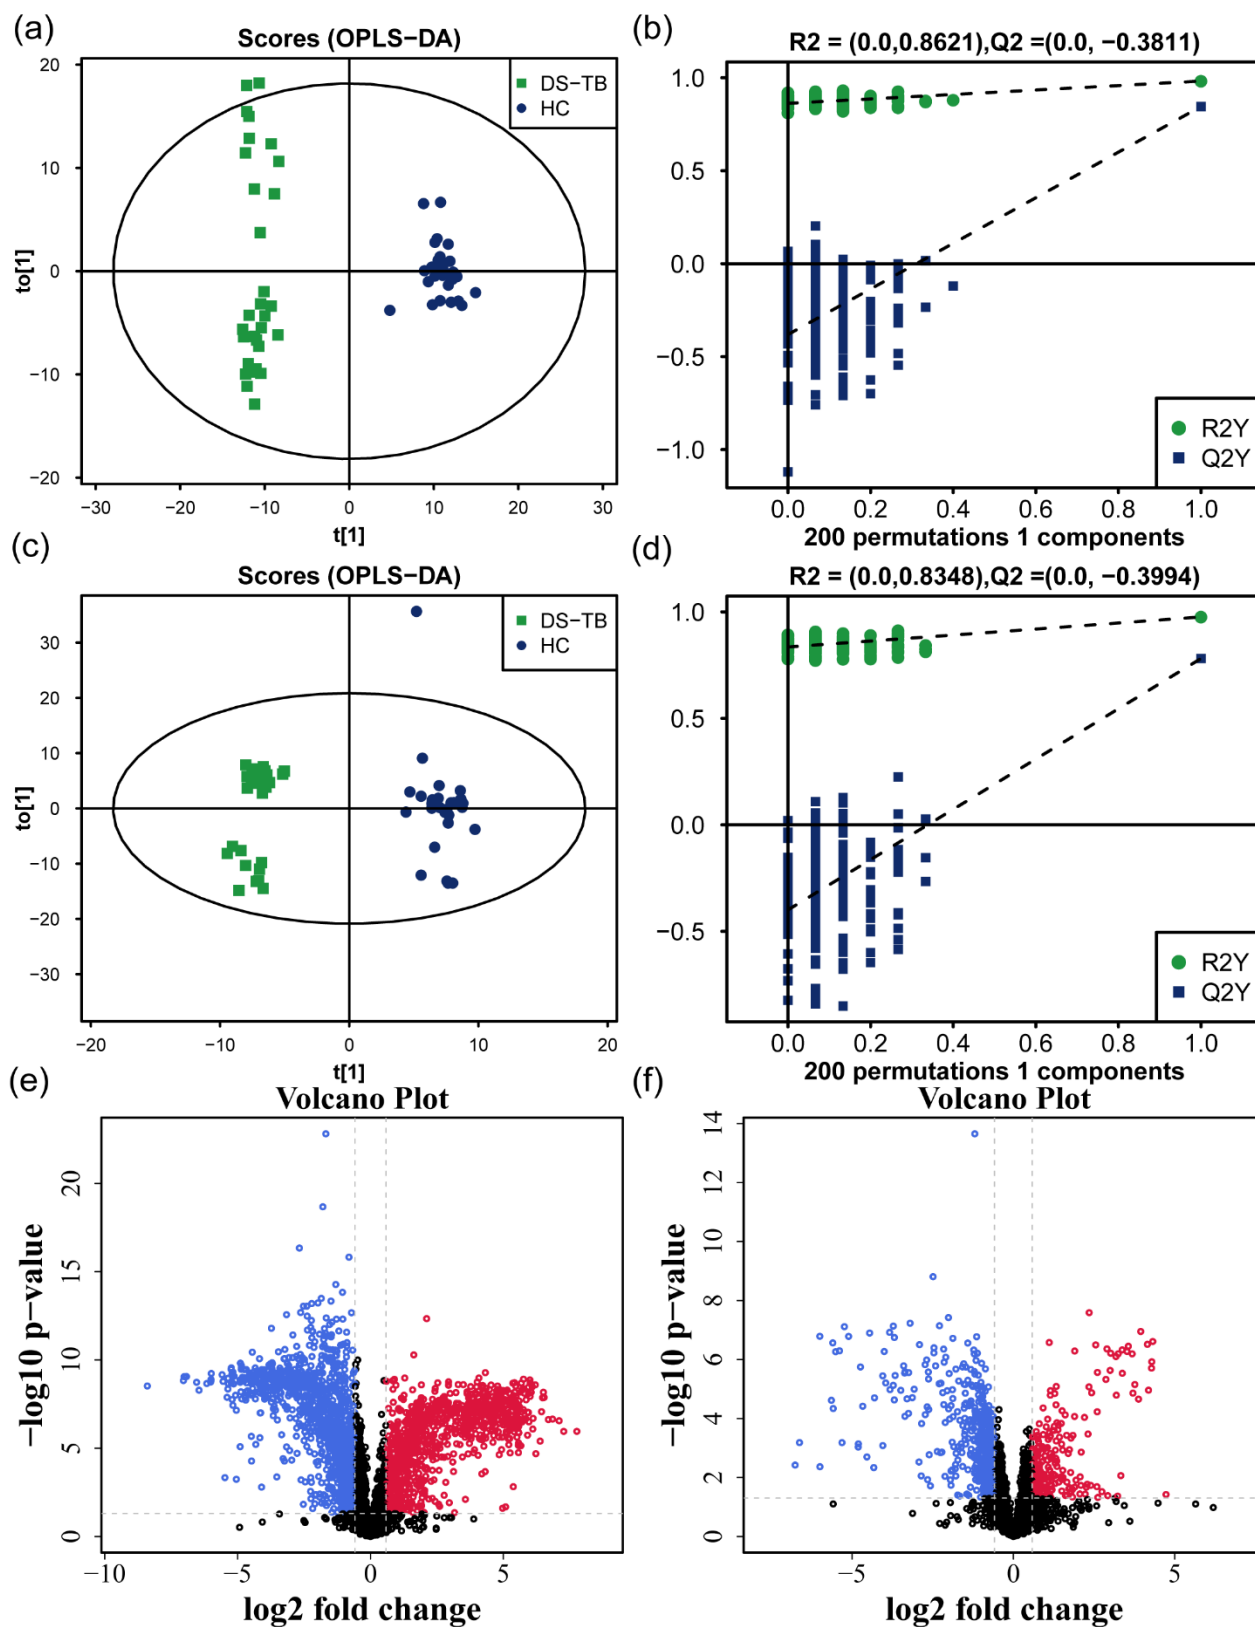

Supplementary Figure 4. The OPLS-DA model and volcano map of DS-TB/HC group in HILIC column.

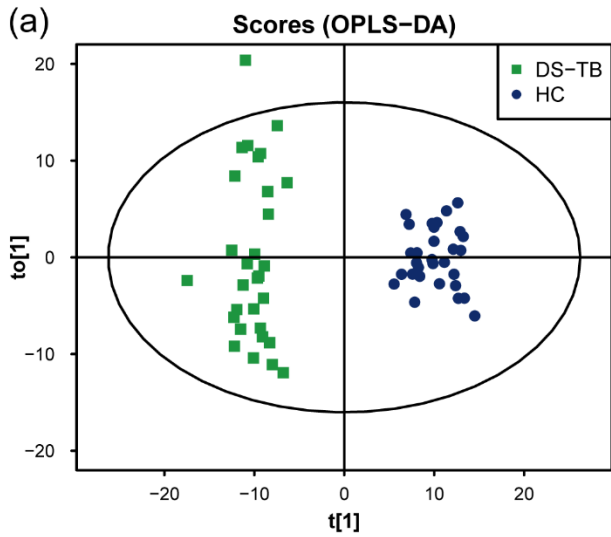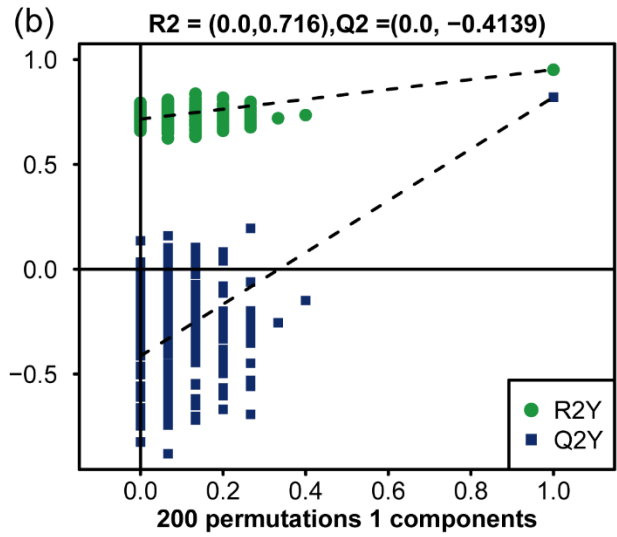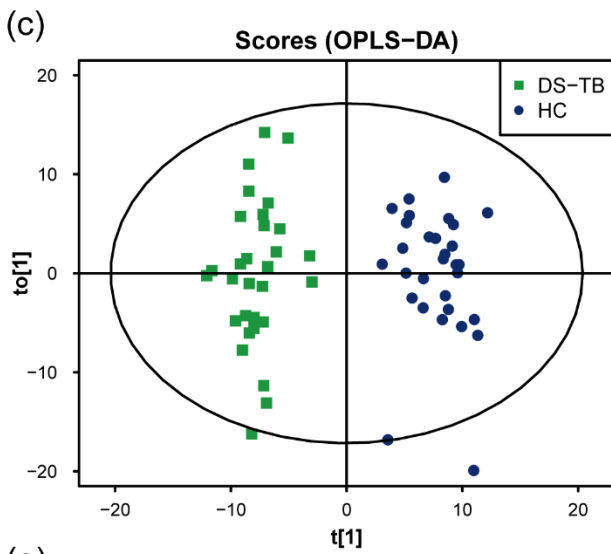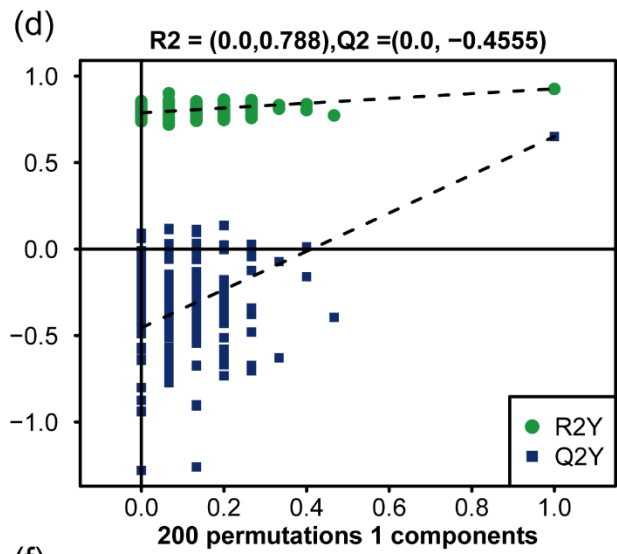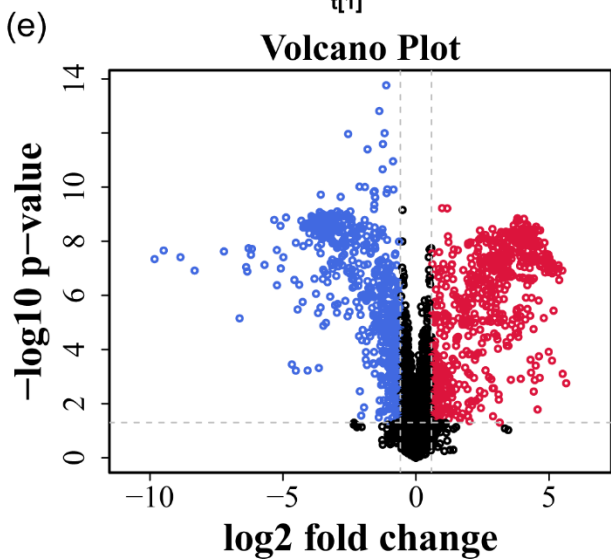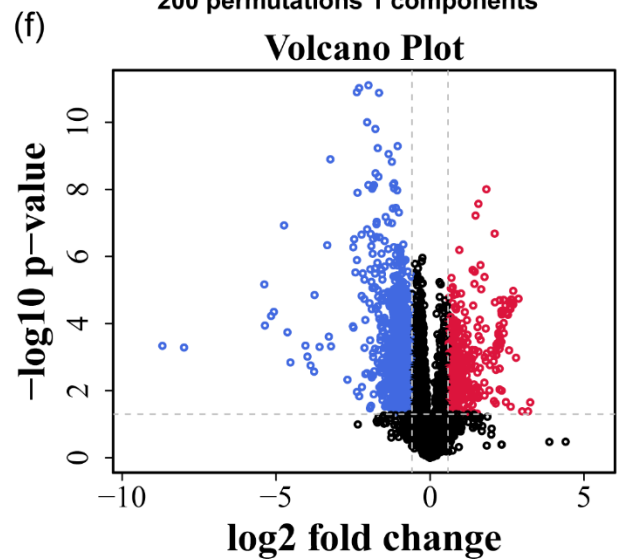

Supplementary Figure 5. The OPLS-DA model and volcano map of DS-TB/HC group in T3 column.

(a)

Enriched KEGG Pathways (Top 20)

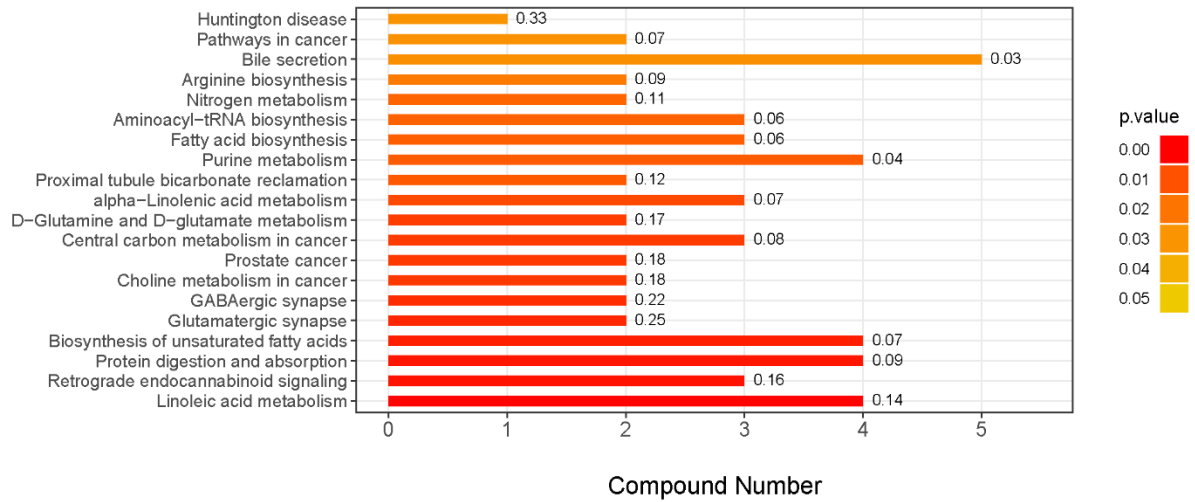

(b)

Enriched KEGG Pathways (Top 20)

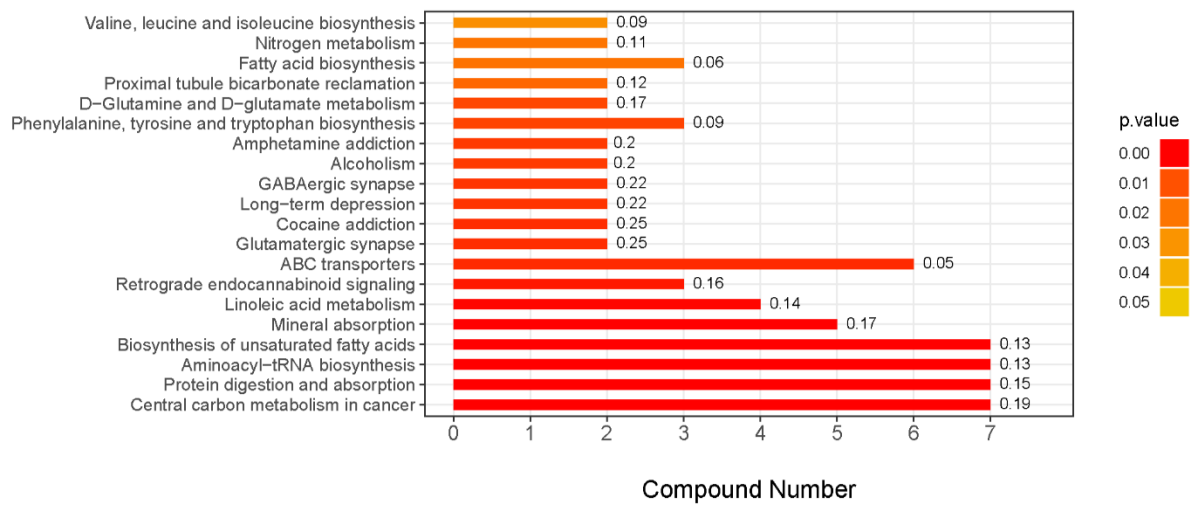

Supplementary Figure 6. The metabolic pathway map of DS-TB/HC group.
